# Supplementary material
Source: HighWire-hosted journal article supplement (http://jpet.aspetjournals.org/highwire/filestream/136429/field_highwire_adjunct_files/1/206623_Supplementary_Figure1_flattened_10-18-2013.pdf)
Supplement: 206623_Supplementary_Figure1_flattened_10-18-2013.pdf [file 206623_Supplementary_Figure1_flattened_10-18-2013.pdf]

**Title: N-aryl piperazine metabotropic glutamate receptor 5 positive allosteric modulators possess efficacy in pre-clinical models of NMDA hypofunction and cognitive enhancement**

**Authors:** K.J. Gregory\*, E.J. Herman\*, A.J. Ramsey, A.S. Hammond, N. E. Byun, S.R. Stauffer, J.T. Manka, S. Jadhav, T.M. Bridges, C.D. Weaver, C.M. Niswender, T. Steckler, W.H. Drinkenburg, A. Ahnaou, H. Lavreysen, G. Macdonald, J. M. Bartolomé, C. Mackie, M. Caron, T. Daigle, C.W. Lindsley, P.J. Conn, C.K. Jones

**Journal:** J. Pharmacol. Exp. Ther.

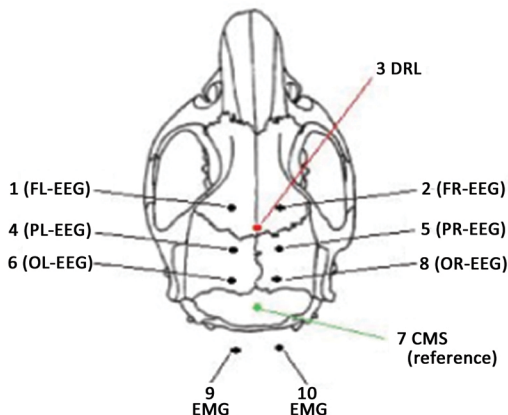

**Supplementary Figure 1: Electrode placement for pharmacoeEG recordings**

Eight stainless steel fixing screws (diameter 1 mm) were inserted bilaterally in the left and right hemisphere along the anterior-posterior axis at the locations (FL, FR; PL, PR and OL, OR, respectively). All electrodes were stereotactically placed (AP +4 mm, L  $\pm$  2 mm; AP -2 mm, L  $\pm$  2 mm and AP -6 mm, L  $\pm$  2 mm from bregma; respectively) and referenced to the same ground electrode placed midline above the cerebellum. The incisor bar was -5 mm under the center of the ear bar according to the stereotactic atlas of Paxinos and Watson (1998).
